# Supplementary material
Source: publisher site journal article supplement (https://www.dovepress.com/article/458294)
Supplement: Supplementary file 1 [file get_supplementary_file.php]

Supplementary Table 1. Odds ratios of sleep disorder and corresponding 95% CIs according to CSF NOS (including tNOS, iNOS, cNOS) level and smoke.

| Model  | Variable     | Adjusted OR (95% CI) | P value           |         |
|--------|--------------|----------------------|-------------------|---------|
| Model1 | tNOS         | Low Level            | Reference         |         |
|        |              | High Level           | 0.46 (0.16, 1.30) | 0.137   |
|        | Smoke        | No                   | Reference         |         |
|        |              | Yes                  | 0.92 (0.32, 2.66) | 0.871   |
|        | Marriage     | Unmarried            | Reference         |         |
|        |              | Married              | 1.16 (0.47, 2.94) | 0.745   |
|        | Living state | Living alone         | Reference         |         |
|        |              | Living with others   | 0.46 (0.13, 1.64) | 0.221   |
|        | BMI          |                      | 1.04 (0.96, 1.13) | 0.354   |
|        | Age          |                      | 1.03 (0.99, 1.08) | 0.107   |
| Model2 | iNOS         | Low Level            | Reference         |         |
|        |              | High Level           | 0.40 (0.17, 0.92) | 0.032*  |
|        | Smoke        | No                   | Reference         |         |
|        |              | Yes                  | 0.98 (0.42, 2.26) | 0.969   |
|        | Marriage     | Unmarried            | Reference         |         |
|        |              | Married              | 1.02 (0.40, 2.61) | 0.970   |
|        | Living state | Living alone         | Reference         |         |
|        |              | Living with others   | 0.48 (0.14, 1.72) | 0.249   |
|        | BMI          |                      | 1.03 (0.95, 1.12) | 0.479   |
|        | Age          |                      | 1.04 (1.00, 1.08) | 0.790   |
| Model3 | cNOS         | Low Level            | Reference         |         |
|        |              | High Level           | 0.28 (0.12, 0.63) | <0.01** |
|        | Smoke        | No                   | Reference         |         |
|        |              | Yes                  | 0.84 (0.37, 1.87) | 0.667   |
|        | Marriage     | Unmarried            | Reference         |         |
|        |              | Married              | 1.17 (0.46, 3.00) | 0.740   |
|        | Living state | Living alone         | Reference         |         |
|        |              | Living with others   | 0.39 (0.11, 1.43) | 0.145   |
|        | BMI          |                      | 1.03 (0.95, 1.13) |         |
|        | Age          |                      | 1.03 (0.99, 1.07) | 0.145   |

Note: Model 1 was a logistic regression analysis with tNOS and smoke as the independent variable and sleep disorder as the dependent variable. Model 2 was a logistic regression analysis with iNOS and smoke as the independent variable and sleep disorder as the dependent variable. Model 3 was a logistic regression analysis with cNOS and smoke as the independent variable and sleep disorder as the dependent variable. The model was adjusted for age, BMI, marriage, and living state. \*p<0.05, \*\*p<0.01.

Abbreviations: BMI, body mass index (calculated as weight in kilograms divided by height in meters squared); tNOS, total nitric oxide synthase; iNOS, inducible nitric oxide synthase; cNOS, constitutive nitric oxide synthase; OR, odds ratio; 95% CI, 95% confidence interval.

Supplementary Table 2. Odds ratios of CSF tNOS levels and corresponding 95% CIs according to CSF iNOS and CSF cNOS levels.

| Variable     | OR (95% CI)       | P value   |
|--------------|-------------------|-----------|
| iNOS         | 1.59 (1.39, 1.87) | <0.001*** |
| cNOS         | 1.07 (1.01, 1.14) | 0.030*    |
| Marriage     | 0.81 (0.22, 3.14) | 0.754     |
| Living state | 1.25 (0.20, 8.32) | 0.811     |
| BMI          | 1.03 (0.90, 1.18) | 0.680     |
| Age          | 1.02 (0.96, 1.08) | 0.534     |

Note: The model was a logistic regression analysis with iNOS and cNOS as the independent variable and tNOS as the dependent variable. The model was adjusted for age, BMI, marriage, and living state. \* $p < 0.05$ , \*\*\* $p < 0.001$ .

Abbreviations: BMI, body mass index (calculated as weight in kilograms divided by height in meters squared); tNOS, total nitric oxide synthase; iNOS, inducible nitric oxide synthase; cNOS, constitutive nitric oxide synthase; OR, odds ratio; 95% CI, 95% confidence interval.

Supplementary Table 3. Odds ratios of sleep disorder and corresponding 95% CIs according to CSF iNOS levels, CSF cNOS levels and smoke.

|              |                    | OR (95% CI)        | P value   |
|--------------|--------------------|--------------------|-----------|
| iNOS         | cNOS               |                    |           |
| Low Level    | Low Level          |                    | Reference |
| Low Level    | High Level         | 0.37 (0.108, 1.10) | 0.086     |
| High Level   | Low Level          | 0.55 (0.18, 1.55)  | 0.264     |
| High Level   | High Level         | 0.15 (0.05, 0.45)  | <0.001*** |
| Smoke        | No                 |                    | Reference |
|              | Yes                | 0.579 (0.22, 1.45) | 0.250     |
| Marriage     | Unmarried          |                    | Reference |
|              | Married            | 1.03 (0.39, 2.72)  | 0.951     |
| Living state | Living alone       |                    | Reference |
|              | Living with others | 0.39 (0.11, 1.43)  | 0.145     |
| BMI          |                    | 1.03 (0.94, 1.13)  | 0.493     |
| Age          |                    | 1.04 (0.99, 1.08)  | 0.093     |

Note: The model was a logistic regression analysis with iNOS, cNOS and smoke as the independent variable and sleep disorder as the dependent variable. The model was adjusted for age, BMI, marriage, and living state. \*\*\*p<0.001.

Abbreviations: BMI, body mass index (calculated as weight in kilograms divided by height in meters squared); iNOS, inducible nitric oxide synthase; cNOS, constitutive nitric oxide synthase; OR, odds ratio; 95% CI, 95% confidence interval.

Supplementary Table 4. Analysis of smoking and PSQI Global scores association with CSF Inducible NOS as a mediator.

|                   | Model1 (PSQI)   |       | Model2 (iNOS)     |        | Model3 (PSQI)    |        |
|-------------------|-----------------|-------|-------------------|--------|------------------|--------|
|                   | $\beta$         | t     | $\beta$           | t      | $\beta$          | t      |
| Age, y            | 0.126           | 1.250 | 0.041             | 0.484  | 0.138            | 1.411  |
| BMI               | 0.155           | 1.685 | -0.101            | -1.306 | 0.125            | 1.393  |
| Marrige           | 0.003           | 0.069 | -0.049            | -1.191 | -0.011           | -0.234 |
| Living status     | 0.039           | 0.596 | -0.062            | -1.130 | 0.020            | 0.321  |
| Smoke             | 0.109***        | 3.206 | -0.245***         | -8.533 | 0.037            | 0.935  |
| CSF Inducible NOS | (--)            | (--)  | (--)              | (--)   | -0.297***        | -3.504 |
| R <sup>2</sup>    | 0.1112          |       | 0.3231            |        | 0.1400           |        |
| F (df)            | 4.65*** (5,185) |       | 19.14*** (5, 185) |        | 6.16*** (5, 185) |        |

Note: Model 1 was a linear regression model with smoke as the independent variable and PSQI as the dependent variable. Model 2 was a linear regression model with smoke as the independent variable and CSF inducible NOS as the dependent variable. Based on Model 1, Model 3 uses CSF inducible NOS and smoke as independent variables. All data were reported as mediation analysis. \*\*\*p<0.001.

Abbreviations: PSQI, Pittsburgh Sleep Quality Index; BMI, body mass index; CSF, cerebral spinal fluid; iNOS, inducible nitric oxide synthase.

Supplementary Table 5. Significance test for mediating effects of smoke, iNOS, and PSQI global scores.

| Effect decomposition | Estimated | 95% CI |       | <i>P</i>  |
|----------------------|-----------|--------|-------|-----------|
|                      |           | Lower  | Upper |           |
| Indirect effect      | 0.073     | 0.031  | 0.120 | <0.001*** |
| Direct effect        | 0.037     | -0.040 | 0.110 | 0.341     |
| Total effect         | 0.109     | 0.042  | 0.180 | <0.01**   |

Note: All data were reported as mediation analysis. Effect decomposition of the mediation model for the relationship between smoking and PSQI global score association with CSF Inducible NOS as mediator. \*\**p* < 0.01, \*\*\**p* < 0.001.

Abbreviations: 95% CI, 95% confidence interval.

Supplementary Table 6. Analysis of smoking and PSQI Global scores association with CSF Constitutive NOS as a mediator.

|                      | Model1 (PSQI)   |       | Model2 (cNOS)     |        | Model3 (PSQI)    |        |
|----------------------|-----------------|-------|-------------------|--------|------------------|--------|
|                      | $\beta$         | t     | $\beta$           | t      | $\beta$          | t      |
| Age, y               | 0.126           | 1.250 | -0.030            | -0.439 | 0.113            | 1.170  |
| BMI                  | 0.155           | 1.685 | 0.009             | 0.149  | 0.159            | 1.807  |
| Marrige              | 0.003           | 0.069 | -0.012            | -0.345 | -0.002           | -0.035 |
| Living status        | 0.039           | 0.596 | 0.011             | 0.253  | 0.044            | 0.701  |
| Smoke                | 0.109***        | 3.206 | -0.204***         | -8.763 | 0.020            | 0.523  |
| CSF Constitutive NOS | (--)            | (--)  | (--)              | (--)   | -0.437***        | -4.234 |
| R <sup>2</sup>       | 0.1112          |       | 0.3035            |        | 0.1640           |        |
| F (df)               | 4.65*** (5,185) |       | 17.56*** (5, 185) |        | 7.22*** (5, 185) |        |

Note: Note: Model 1 was a linear regression model with smoke as the independent variable and PSQI as the dependent variable. Model 2 was a linear regression model with smoke as the independent variable and CSF constitutive NOS as the dependent variable. Based on Model 1, Model 3 uses CSF constitutive NOS and smoke as independent variables. All data were reported as mediation analysis. \*\*\*p < 0.001.

Abbreviations: PSQI, Pittsburgh Sleep Quality Index; BMI, body mass index; CSF, cerebral spinal fluid; cNOS, constitutive nitric oxide synthase.

Supplementary Table 7. Significance test for mediating effects of smoke, cNOS, and PSQI global scores.

| Effect decomposition | Estimated | 95% CI |       | <i>P</i>  |
|----------------------|-----------|--------|-------|-----------|
|                      |           | Lower  | Upper |           |
| Indirect effect      | 0.089     | 0.046  | 0.140 | <0.001*** |
| Direct effect        | 0.019     | -0.055 | 0.090 | 0.608     |
| Total effect         | 0.109     | 0.042  | 0.180 | <0.01**   |

Note: All data were reported as mediation analyses. Effect decomposition of the mediation model for the relationship between smoking and PSQI global score association with CSF Constitutive NOS as mediator. \*\**p* < 0.01, \*\*\**p* < 0.001.

Abbreviations: 95% CI, 95% confidence interval.

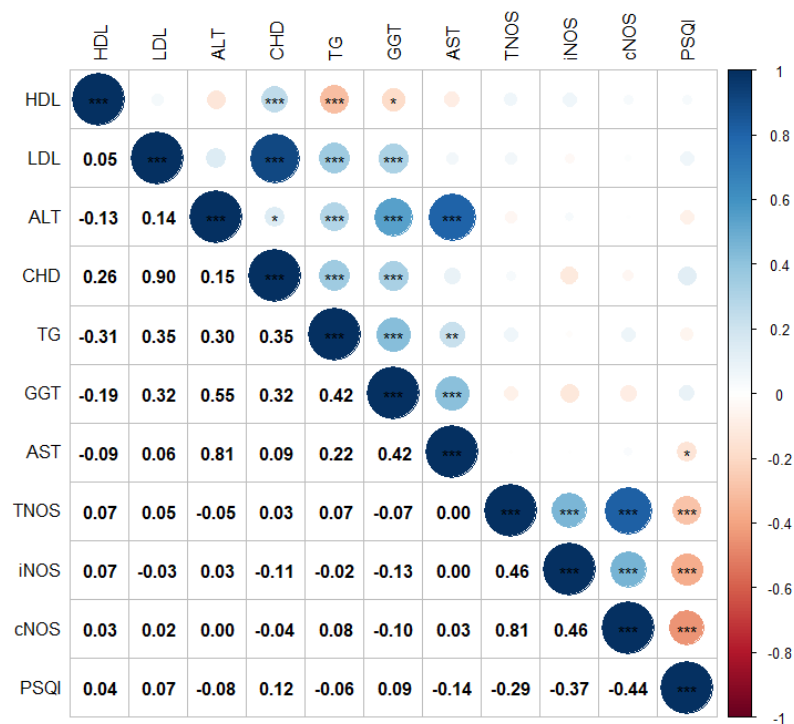

Supplementary Figure 1. Correlation of physiological indices with PSQI Global scores in the general group.

Note: All data were reported as Spearman correlation analysis. \* $p < 0.05$ , \*\* $p < 0.01$ , \*\*\* $p < 0.001$ . Abbreviations: PSQI, Pittsburgh Sleep Quality Index; HDL, high-density lipoprotein; LDL, low-density lipoprotein; TG, triglyceride; CHO, cholesterol; ALT, alanine transaminase; AST, aspartate aminotransferase; GGT,  $\gamma$ -glutamyltransferase; TNOS, total nitric oxide synthase; iNOS, inducible nitric oxide synthase; cNOS, constitutive nitric oxide synthase.



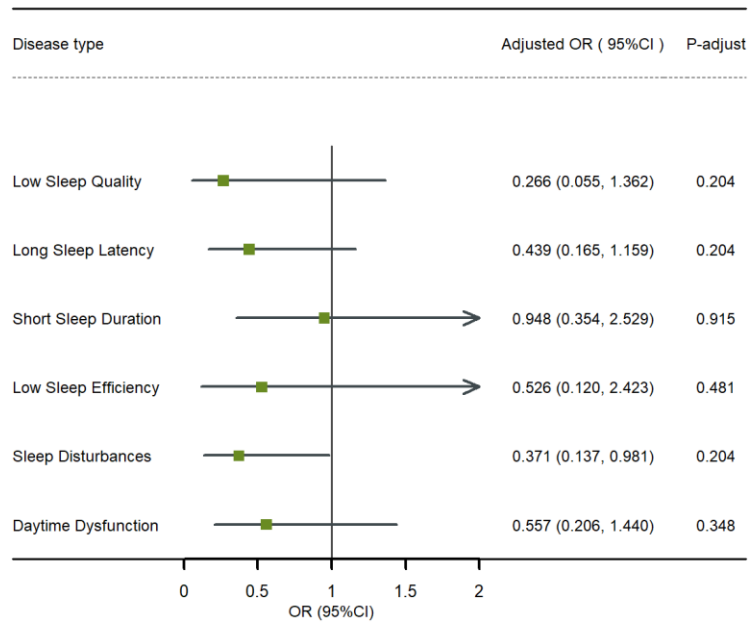

Supplementary Figure 2. Odds ratios of PSQI components and corresponding 95% CIs according to median CSF Total NOS.

Note: OR, odds ratio; 95% CI, 95% confidence interval; P-adjust, FDR-corrected P.
